# Supplementary material for: Gen-FS coordinated proficiency test data for genomic foodborne pathogen surveillance, 2017 and 2018 exercises
Source: PubMed Central journal article supplement (PMC7677400; doi:10.1038/s41597-020-00740-7), 2020-11-19
Supplement: 41597_2020_740_MOESM2_ESM.pdf [file 41597_2020_740_MOESM2_ESM.pdf]

## Supplementary Files:

### Table of Contents:

| <b>Supplementary Files</b> | <b>Page #</b> |
|----------------------------|---------------|
| Supplementary File 2       | 2             |
| Supplementary File 3       | 4             |
| Supplementary File 4       | 19            |
| Supplementary File 5       | 23            |

**Table S1.** 2017 Proficiency testing grade distribution among PulseNet participating laboratories

| Points scored | Salmonella <sup>1</sup> | STEC <sup>1</sup> |
|---------------|-------------------------|-------------------|
| <85           | 1                       | 1                 |
| 85-90         | 0                       | 0                 |
| 91-95         | 2                       | 1                 |
| 96-100        | 28                      | 29                |

<sup>1</sup> Number of laboratories in each points category

**Report 1.** Example 2017 PulseNet proficiency test reports for *Salmonella* and STEC, both prepared for anonymized laboratory #84. Names of laboratory and people have been removed from the report.

**1st PulseNet WGS Proficiency Testing Report Form (Winter 2017)**

**Organism:** *Salmonella enterica*

**Laboratory:** #84      **Date strains shipped:** 1/30/2017      **Date results received:** 3/22/2017

|                                                             | <u>Possible Points</u> | <u>No. of Points Received</u> | <u>Comments</u>                                                                                 |
|-------------------------------------------------------------|------------------------|-------------------------------|-------------------------------------------------------------------------------------------------|
| <b>I. Critical Quality Metrics (70 pts)</b>                 |                        |                               |                                                                                                 |
| A. Average coverage (>30x)                                  | Pass/Fail              | <u>Pass</u>                   | SAP17-7299 (86x), SAP17-7399 (116x), SAP17-7699 (73x); SAP17-H8290 (73x)                        |
| B. Average insert size (>300)                               | Pass/Fail              | <u>Pass</u>                   | SAP17-7299 (497 bp), SAP17-7399 (493 bp), SAP17-7699 (509 bp); SAP17-H8290 (511 bp)             |
| C. Assembled genome size (4.4 MB, 5% error margin)          | Pass/Fail              | <u>Pass</u>                   | SAP17-7299 (4.9Mbp), SAP17-7399 (4.8Mbp), SAP17-7699 (4.9Mbp); SAP17-H8290 (4.9Mbp)             |
| D. Number of hqSNPs compared to reference (< 1 / MB)        | Pass/Fail              | <u>Pass</u>                   | SAP17-7299 (0 SNPs), SAP17-7399 (0 SNPs), SAP17-7699 (0 SNPs); SAP17-H8290 (0 SNPs)             |
| E. Number of allele differences compared to reference (≤ 3) | Pass/Fail              | <u>Pass</u>                   | SAP17-7299 (0 alleles), SAP17-7399 (0 alleles), SAP17-7699 (0 alleles); SAP17-H8290 (0 alleles) |
| <b>II. Additional Metrics (30 pts)</b>                      |                        |                               |                                                                                                 |
| A. Q-score R1 (>30)                                         | 8 points               | 8                             | SAP17-7299 (36.6), SAP17-7399 (36.3), SAP17-7699 (36.4); SAP17-H8290 (36.4)                     |
| B. Q-score R2 (>30)                                         | 8 points               | 8                             | SAP17-7299 (35.4), SAP17-7399 (35.2), SAP17-7699 (34.8); SAP17-H8290 (34.5)                     |
| C. PT isolates run with routine isolates                    | 4 points               | 4                             |                                                                                                 |
| D. Results correctly submitted to BaseSpace or FTP          | 4 points               | 4                             |                                                                                                 |
| E. Fastq files named correctly                              | 4 points               | 4                             |                                                                                                 |
| F. Submission email sent to PulseNet@cdc.gov                | 2 points               | 2                             |                                                                                                 |
| Total points received                                       |                        | 100                           |                                                                                                 |
| Overall proficiency testing result                          | Pass or Fail           | <u>Pass</u>                   |                                                                                                 |

WGS Performed by:

Results Submitted by:

Equipment used: Illumina MiSeq

Chemistry used: V2 500 cycle kit and Nextera Library Prep

Comments:

All items in section I on the report form are in Pass / Fail format. If you fail any one of these sections, you fail the proficiency testing round. Laboratories that pass will accumulate the specified points. For quality metrics, all files were compared to the PulseNet WGS Quality Metrics (SOP appendix PNQ09-5). A passing score is ≥85% (≥85/100). The methods used in the analysis of this sequence data are preliminary and remain under validation.

**Proficiency Testing Evaluation:**

Performed By: \_\_\_\_\_

**Date of Report:**

Performed By: \_\_\_\_\_

**Date of Report:**

Reviewed By: \_\_\_\_\_

**Date of Review:**

Approved By: \_\_\_\_\_

**Date of Approval:**

**1st PulseNet WGS Proficiency Testing Report Form (Winter 2017)**

Organism: STEC

Laboratory: #84

Date strains shipped:

1/30/2017

Date results received: 3/21/17

|                                                             | Possible Points | No. of Points Received | Comments                                                   |
|-------------------------------------------------------------|-----------------|------------------------|------------------------------------------------------------|
| <b>I. Critical Quality Metrics (70 pts)</b>                 |                 |                        |                                                            |
| A. Average coverage (>40x)                                  | Pass/Fail       | <u>Pass</u>            | ECPT17-46 (60X);<br>ECPT-1298 (60X)                        |
| B. Average insert size (>300)                               | Pass/Fail       | <u>Pass</u>            | ECPT17-46 (509 bp);<br>ECPT17-1298 (508 bp)                |
| C. Assembled genome size (5.5 MB, 5% error margin)          | Pass/Fail       | <u>Pass</u>            | ECPT17-46 (5.4MB);<br>ECPT-1298 (5.3MB)                    |
| D. Number of hqSNPs compared to reference (< 1 / MB)        | Pass/Fail       | <u>Pass</u>            | ECPT17-46 (0 SNPs);<br>ECPT17-1298 (1 SNP)                 |
| E. Number of allele differences compared to reference (≤ 6) | Pass/Fail       | <u>Pass</u>            | ECPT17-46 (0 allele diff.)<br>ECPT17-1298 (3 allele diff.) |
| <b>II. Additional Metrics (30 pts)</b>                      |                 |                        |                                                            |
| A. Q-score R1 (>30)                                         | 8 points        | 8                      | ECPT17-46 (35.8);<br>ECPT17-1298 (36.8)                    |
| B. Q-score R2 (>30)                                         | 8 points        | 8                      | ECPT17-46 (30.1);<br>ECPT17-1298 (35.3)                    |
| C. PT isolates run with routine isolates                    | 4 points        | 4                      |                                                            |
| D. Results correctly submitted to BaseSpace or FTP          | 4 points        | 4                      |                                                            |
| E. Fastq files named correctly                              | 4 points        | 4                      |                                                            |
| F. Submission email sent to PulseNet@cdc.gov                | 2 points        | 2                      |                                                            |
| Total points received                                       |                 | 100                    |                                                            |
| Overall proficiency testing result                          | Pass or Fail    | <u>Pass</u>            |                                                            |

WGS Performed by:

Results Submitted by:

Equipment used: Illumina MiSeq instrument ID

Chemistry used: Illumina MiSeq V2 (500 cycle)

Comments: Nice work!

All items in section I on the report form are in Pass / Fail format. If you fail any one of these sections, you fail the proficiency testing round. Laboratories that pass will accumulate the specified points. For quality metrics, all files were compared to the PulseNet WGS Quality Metrics (SOP appendix PNQ09-5). A passing score is >=85% (>=85/100). The methods used in the analysis of this sequence data are preliminary and remain under validation.

**Proficiency Testing Evaluation**

Performed By:

Date of Report:

Performed By:

Date of Report:

Reviewed By:

Date of Review:

Approved By:

Date of Approval:

**Report 2.** Example 2017 GenomeTrakr proficiency test report prepared for anonymized laboratory #80, shown against the distribution of runs from all participating GenomeTrakr labs. Names of laboratory and people removed from the report.

# GenomeTrakr Statistical Report for the 2017 PulseNet-GT harmonized Proficiency Testing Exercise

Joseph Baugher, Ph.D.

May 16, 2017

## Contents

|          |                               |           |
|----------|-------------------------------|-----------|
| <b>1</b> | <b>Overview</b>               | <b>2</b>  |
| <b>2</b> | <b>Results</b>                | <b>3</b>  |
| 2.1      | Sample Annotation . . . . .   | 3         |
| 2.2      | Data Plots . . . . .          | 4         |
| <b>3</b> | <b>Conclusions</b>            | <b>14</b> |
| <b>4</b> | <b>Additional Information</b> | <b>15</b> |

# 1 Overview

This report summarizes the results of the whole genome sequencing portion of the 2017 PulseNet-GT harmonized Proficiency Testing (PT) Exercise. This portion of the exercise was intended to assess the ability of a laboratory to perform cell culturing, DNA isolation, and the generation of high quality sequence data using the Illumina MiSeq/Nextera XT system while following the SOP.

Sequencing runs were analyzed using the CFSAN SNP Pipeline v0.7.0 with closed reference sequences generated by the Pacific Biosciences (PacBio) sequencer. Standard metrics are provided by the CFSAN SNP Pipeline. Sequencing run quality was assessed using FastQC v0.11.4. Assembly quality was assessed using the SPAdes Genome Assembler v3.8.0 and QUAST v3.0.

|   | Isolate ID | Organism                                            |
|---|------------|-----------------------------------------------------|
| 1 | SAP17-7299 | Salmonella enterica enterica Typhimurium SAP17-7299 |
| 2 | SAP17-7399 | Salmonella enterica enterica Typhimurium SAP17-7399 |
| 3 | SAP17-7699 | Salmonella enterica enterica Typhimurium SAP17-7699 |
| 4 | SAP17-8290 | Salmonella enterica enterica Typhimurium SAP17-8290 |
| 5 | ECP17-1298 | Escherichia coli O157:H7 ECP17-1298                 |
| 6 | ECP17-46   | Escherichia coli O157:H7 ECP17-46                   |

Table 1: The 2017 PulseNet-GT harmonized PT strains.

## 2 Results

### 2.1 Sample Annotation

No sample annotation problems were detected.

|   | Sample Name       | Expected Isolate | Sequenced Isolate |
|---|-------------------|------------------|-------------------|
| 1 | ECP17-1298-M03215 | ECP17-1298       | ECP17-1298        |
| 2 | ECP17-46-M03215   | ECP17-46         | ECP17-46          |
| 3 | SAP17-7299-M03215 | SAP17-7299       | SAP17-7299        |
| 4 | SAP17-7399-M03215 | SAP17-7399       | SAP17-7399        |
| 5 | SAP17-7699-M03215 | SAP17-7699       | SAP17-7699        |
| 6 | SAP17-8290-M03215 | SAP17-8290       | SAP17-8290        |

Table 2: Samples submitted for analysis.

## 2.2 Data Plots

The following section contains graphical representations of your PT sequencing run (colored data points) and the distribution of runs from all participating GenomeTrakr labs (boxplots with black outlier data points). The isolates are labeled (x-axis) using the numeric portion of the CFSAN ID (see Table 1). For each box plot, the box defines the median value as well as the lower and upper quartiles (25% and 75%). The whiskers extend to the most extreme data point which is no more than 2.5 times the interquartile range from the median.

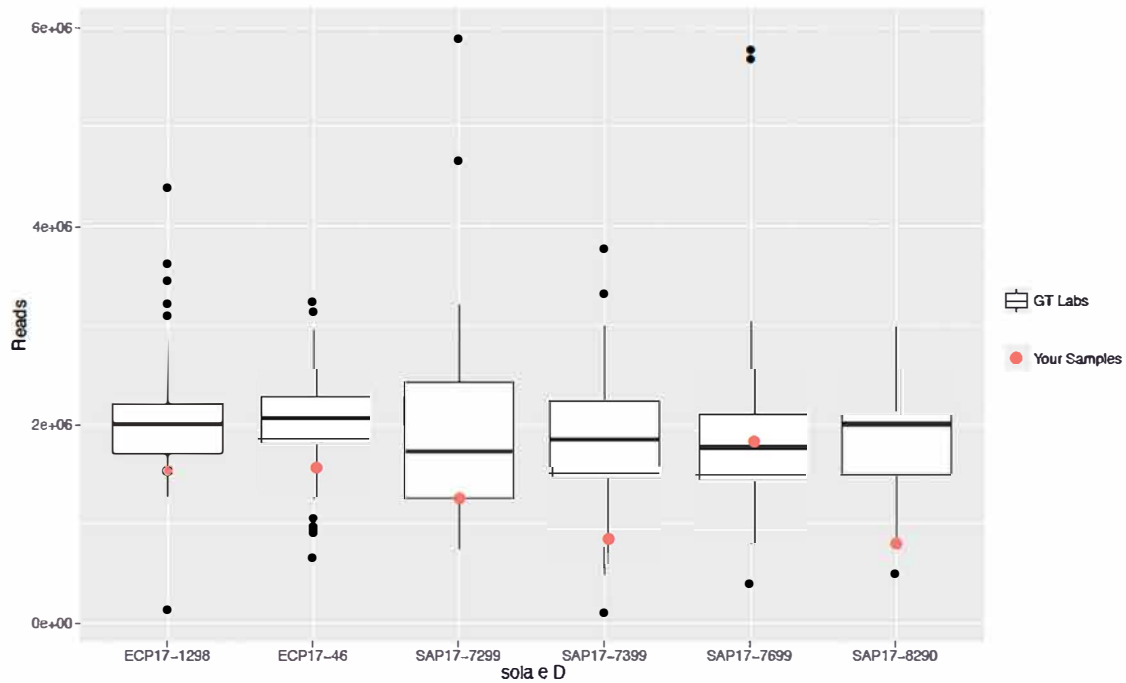

Figure 1: The number of sequencing reads.

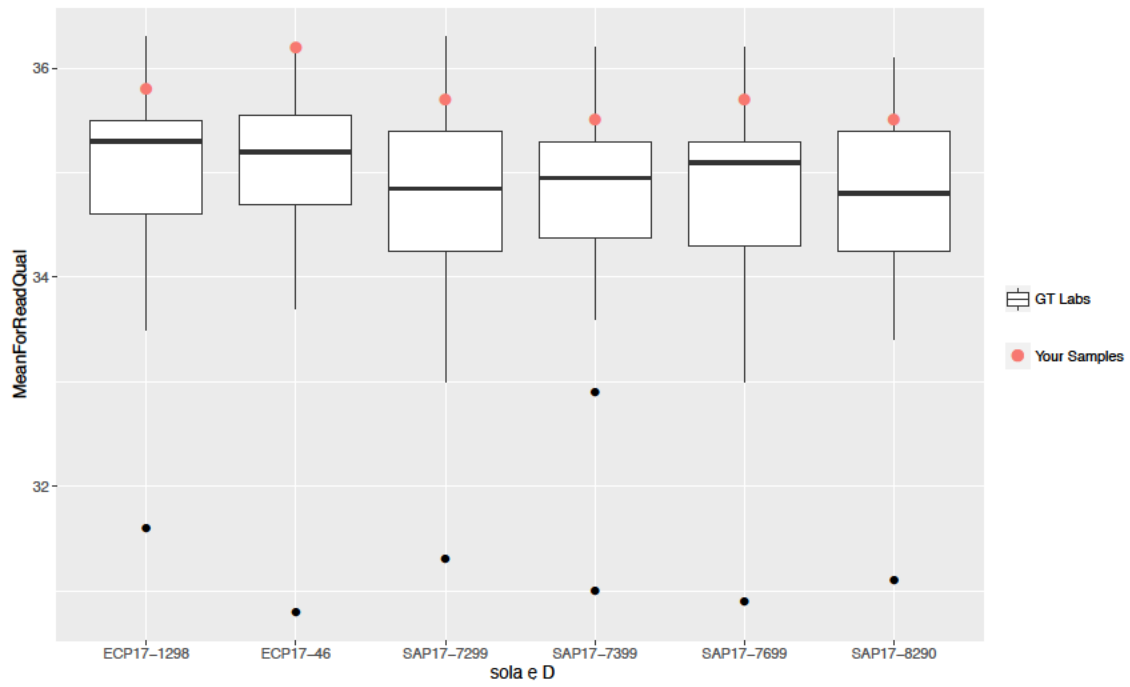

Figure 2: The mean quality score - forward reads.



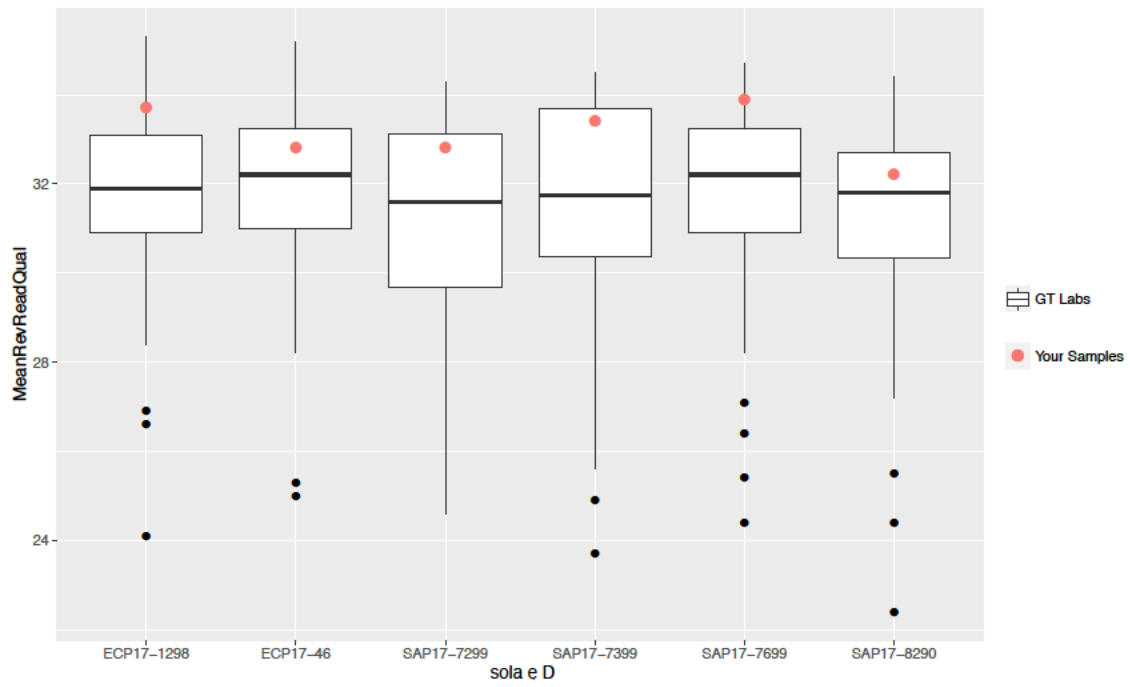

Figure 3: The mean quality score - reverse reads.

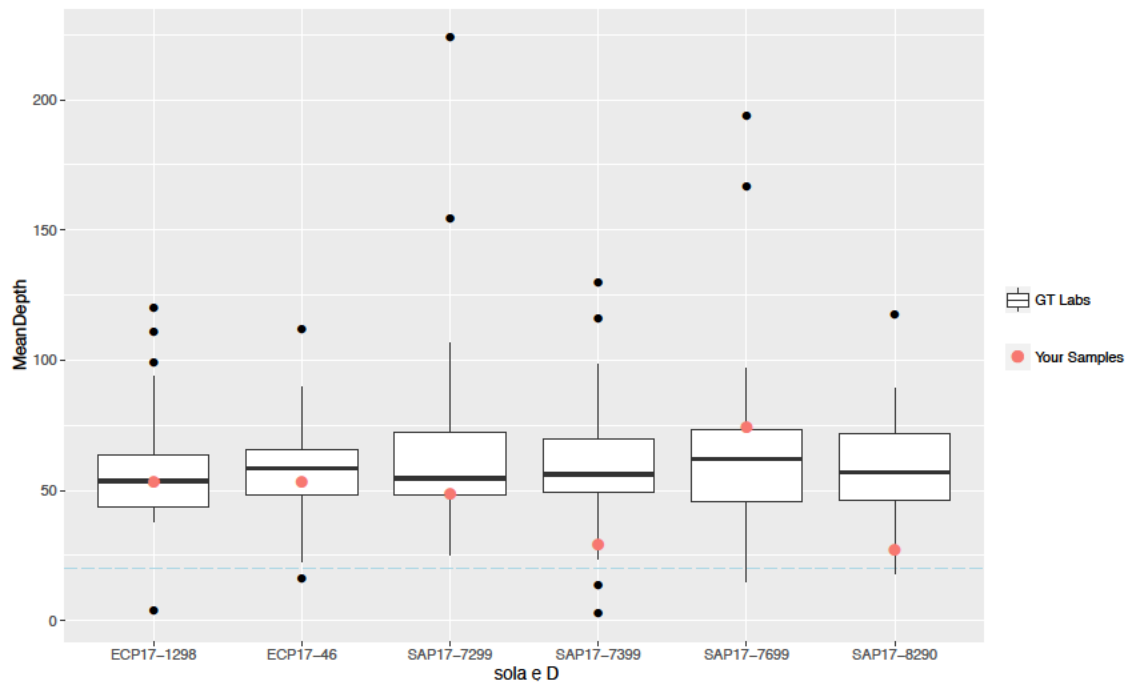

Figure 4: The mean depth of mapped reads. The dashed horizontal line illustrates the current threshold (20X) for sequence submission.

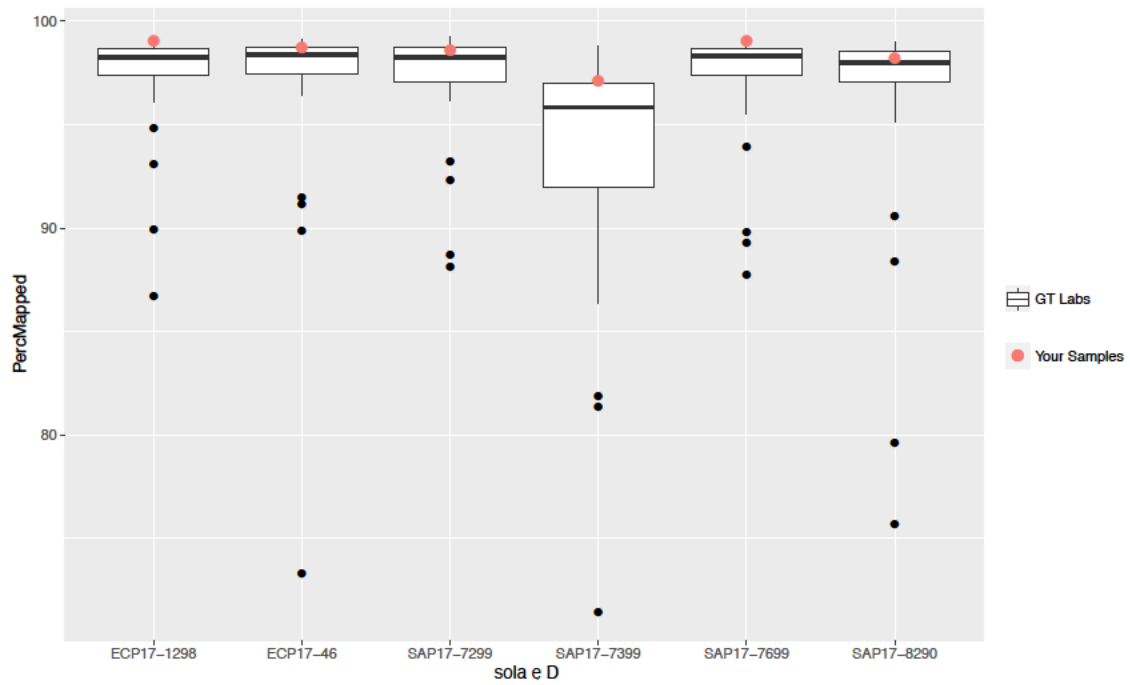

Figure 5: The percentage of reads which could be mapped to the reference genome.

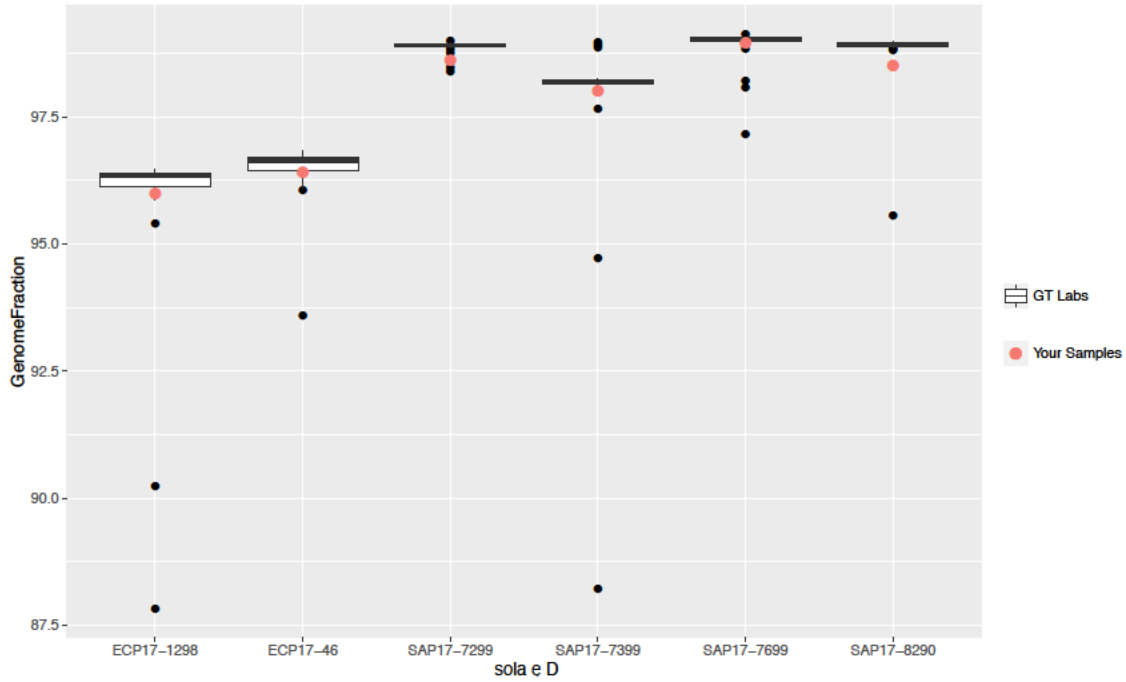

Figure 6: Genome fraction (%). The total number of aligned bases in the reference, divided by the genome size. A base in the reference genome is counted as aligned if at least one contig has at least one alignment to this base. Contigs from repeat regions may map to multiple places, and thus may be counted multiple times in this quantity.

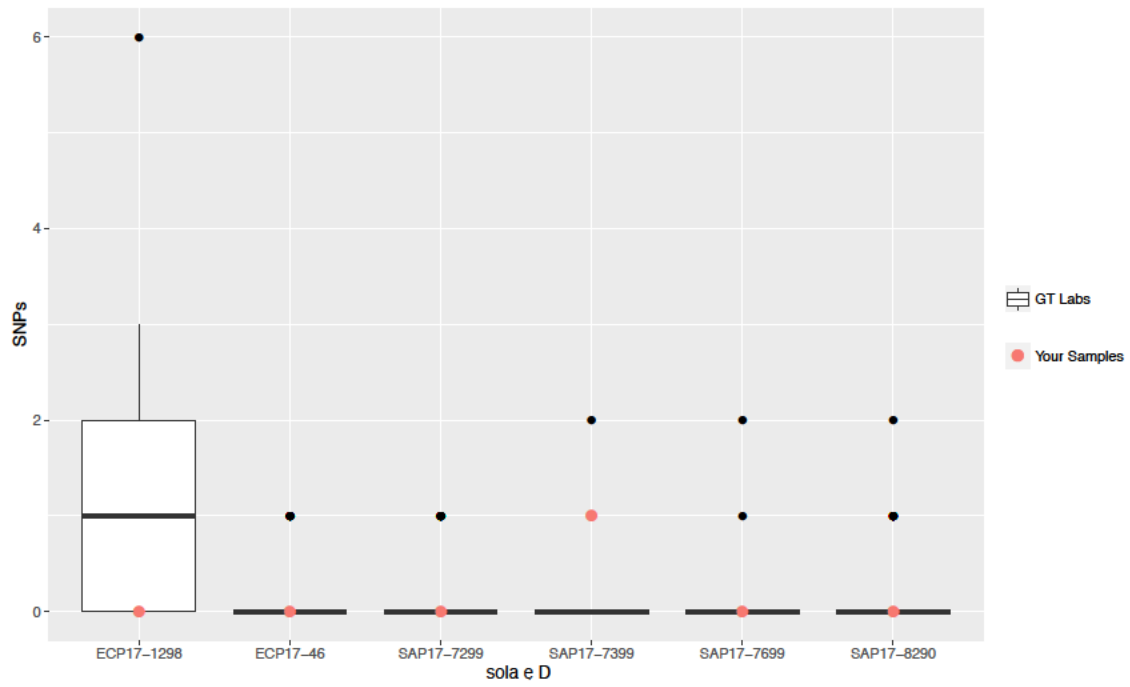

Figure 7: The number of SNPs reported.

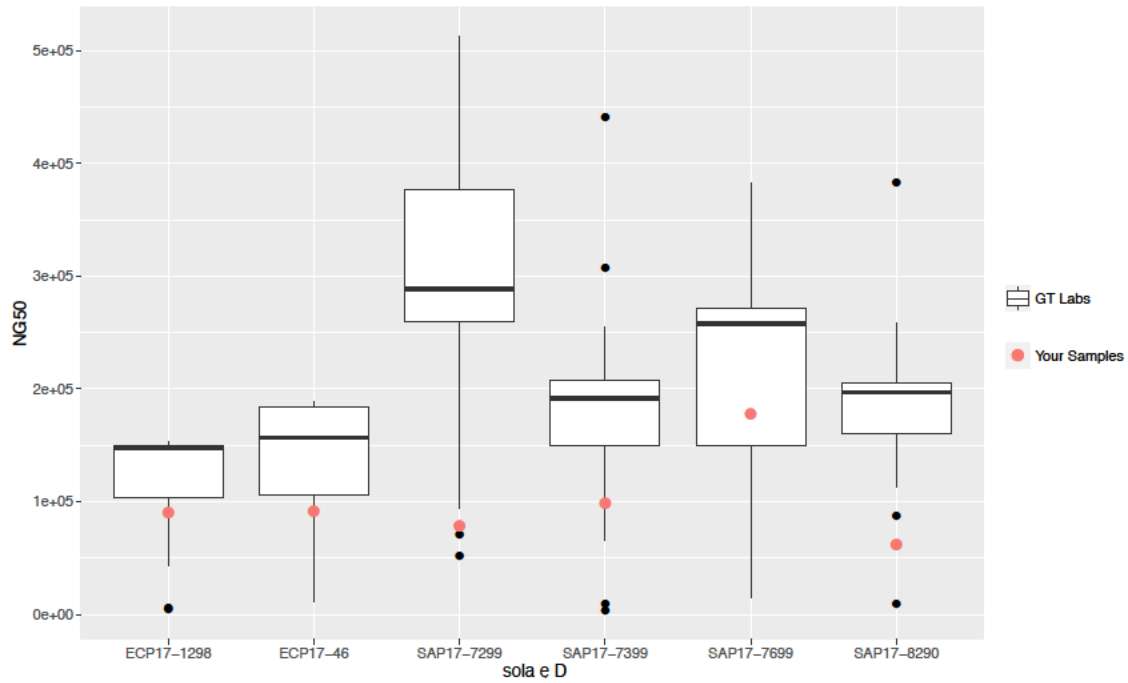

Figure 8: The NG50 assembly quality metric. The contig length such that using equal or longer length contigs produces x% of the length of the reference genome, allowing for comparisons between different genomes. Larger NG50 values generally correlate with a higher quality assembly.

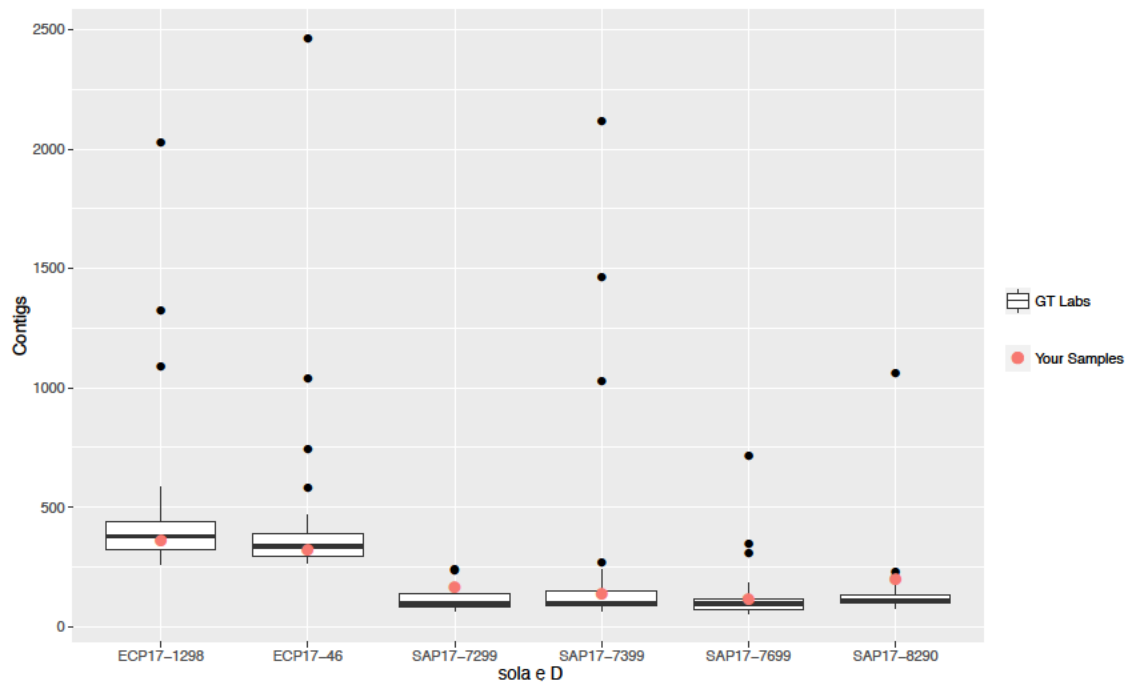

Figure 9: The total number of contigs in the assembly. Fewer contigs generally correlate with a higher quality assembly.

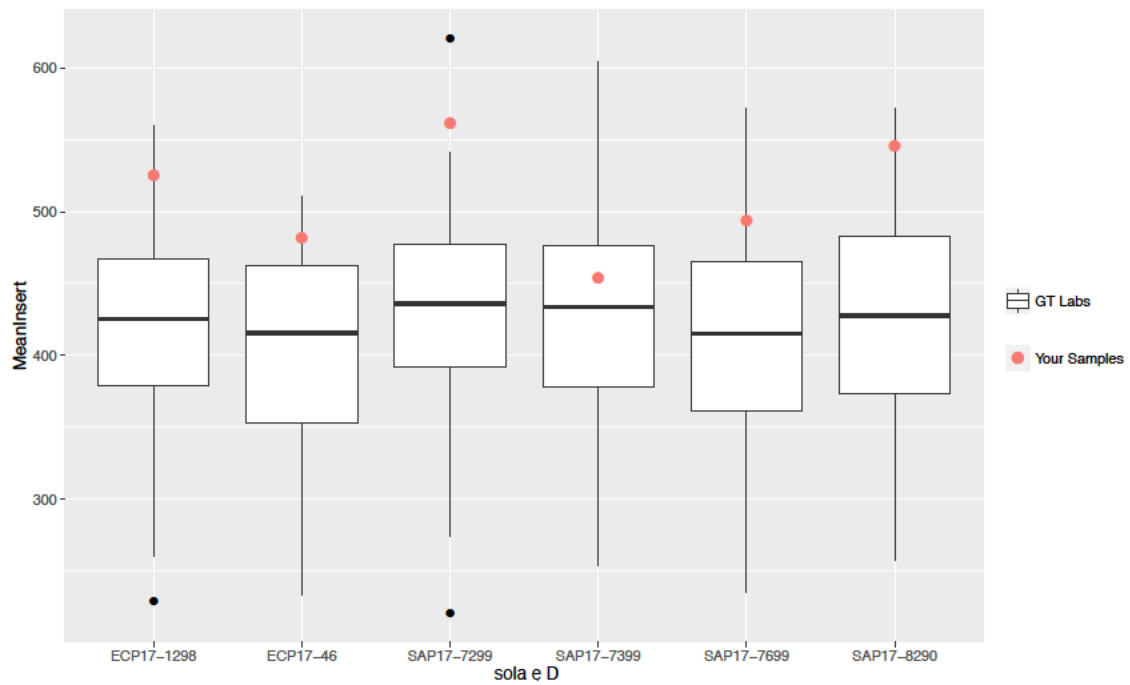

Figure 10: The mean insert size, defined as the length of the sequence between the adapters.



### 3 Conclusions

The results of the PT analysis revealed that all samples were properly annotated regarding organisms sequenced. Figures 1-10 illustrate the performance of your PT sequencing run using a variety of metrics. Pay particular attention to any figures in which values for your run fall outside of the 25% - 75% interquartile range (the boundaries of the box in the plot).

The mean read depth of sequencing runs is expected to be above the minimum threshold for NCBI submission (20X). Of 6 samples, 6 (100%) were correctly annotated and above the submission threshold.

## 4 Additional Information

| SampleName    | IsolateID  | CFSANID     | Lab | Sequencer               | Machine | FlowCell        | LibKit     | RunDate             | SequencedBy |
|---------------|------------|-------------|-----|-------------------------|---------|-----------------|------------|---------------------|-------------|
| 1 ECP17-1298- | ECP17-1298 | CFSAN059541 |     | Illumina MiSeq sequence |         | 000000000-AUTAF | Nextera XT | 2017-03-17 22:41:22 |             |
| 2 ECP17-46-   | ECP17-46   | CFSAN059540 |     | Illumina MiSeq sequence |         | 000000000-AUTAF | Nextera XT | 2017-03-17 22:41:22 |             |
| 3 SAP17-7299- | SAP17-7299 | CFSAN059543 |     | Illumina MiSeq sequence |         | 000000000-AUTAF | Nextera XT | 2017-03-17 22:41:22 |             |
| 4 SAP17-7399- | SAP17-7399 | CFSAN059545 |     | Illumina MiSeq sequence |         | 000000000-AUTAF | Nextera XT | 2017-03-17 22:41:22 |             |
| 5 SAP17-7699- | SAP17-7699 | CFSAN059544 |     | Illumina MiSeq sequence |         | 000000000-AUTAF | Nextera XT | 2017-03-17 22:41:22 |             |
| 6 SAP17-8290- | SAP17-8290 | CFSAN059542 |     | Illumina MiSeq sequence |         | 000000000-AUTAF | Nextera XT | 2017-03-17 22:41:22 |             |

Table 3: Run Metadata.

| SampleName    | Reads   | PercMapped | MeanForReadQual | MeanRevReadQual | MeanDepth | SNPs | MeanInsert | NG50   | GenomeFraction | Contigs |
|---------------|---------|------------|-----------------|-----------------|-----------|------|------------|--------|----------------|---------|
| 1 ECP17-1298- | 1539230 | 99.04      | 35.80           | 33.70           | 53.32     | 0    | 524.97     | 89535  | 95.97          | 362     |
| 2 ECP17-46-   | 1616362 | 98.69      | 36.20           | 32.80           | 53.40     | 0    | 481.31     | 91482  | 96.42          | 322     |
| 3 SAP17-7299- | 1254964 | 98.60      | 35.70           | 32.80           | 48.43     | 0    | 561.73     | 77996  | 98.61          | 165     |
| 4 SAP17-7399- | 902692  | 97.10      | 35.50           | 33.40           | 29.04     | 1    | 453.88     | 98206  | 98.01          | 134     |
| 5 SAP17-7699- | 1880370 | 99.01      | 35.70           | 33.90           | 74.03     | 0    | 493.87     | 177133 | 98.94          | 115     |
| 6 SAP17-8290- | 790590  | 98.17      | 35.50           | 32.20           | 27.22     | 0    | 545.22     | 62108  | 98.50          | 200     |

Table 4: Run Metadata Continued.

**Table S2.** 2018 Proficiency testing grade distribution among PulseNet participating laboratories

| Points scored | <i>Salmonella</i> <sup>1</sup> | <i>Listeria</i> <sup>1</sup> |
|---------------|--------------------------------|------------------------------|
| <85           | 6                              | 4                            |
| 85-90         | 3                              | 11                           |
| 91-95         | 9                              | 7                            |
| 96-100        | 28                             | 24                           |

<sup>1</sup> Number of laboratories in each points category

**Report 3.** Example 2018 PulseNet proficiency test reports prepared for anonymized laboratory #59 (*Listeria*) and anonymized laboratory #81 (*Salmonella*). Names of laboratories and people removed from both reports.

**2nd PulseNet WGS Proficiency Testing Report Form (Winter 2018)**

**Organism:** *Listeria monocytogenes*

**Laboratory:** #59

Date strains shipped: 1/22/2018

Date results received: 2/27/2018

|                                                                                                         | Possible Points            | No. of Points Received | Comments                                 |
|---------------------------------------------------------------------------------------------------------|----------------------------|------------------------|------------------------------------------|
| <b>I. Sequencing and Fastq file Preparation (80 pts)</b>                                                |                            |                        |                                          |
| A. Q-score R1<br>(>30 = 4 pts; 28.00 - 29.99 plus 10-20x additional coverage = 1-3 pts; <28.00 = 0 pts) | Pass (1-4 pts) or Fail (0) | 4                      | LMP18-H8393 (37.16), LMP18-H2446 (36.88) |
| B. Q-score R2<br>(>30 = 4 pts; 28.00 - 29.99 plus 10-20x additional coverage = 1-3 pts; <28.00 = 0 pts) | Pass (1-4 pts) or Fail (0) | 4                      | LMP18-H8393 (36.04), LMP18-H2446 (35.74) |
| C. Average coverage (>20x)                                                                              | Pass (12 pts) or Fail      | 12                     | LMP18-H8393 (203.9X), LMP18-H2446 (130X) |
| D. Median insert size (>300 = 12 pts; 275 - 299 = 8 pts; <274 = 2 pts)                                  | 12 points                  | 7                      | LMP18-H8393 (227), LMP18-H2446 (433)     |
| E. Assembled genome size (3 MB, 5% error margin)                                                        | Pass (12 pts) or Fail      | 12                     | LMP18-H8393 (3.0MB), LMP18-H2446 (2.8MB) |
| F. Percent Core (≥95%)                                                                                  | Pass (12 pts) or Fail      | 12                     | LMP18-H8393 (97.8%), LMP18-H2446 (97.7%) |
| G. Number of hqSNPs compared to reference (< 1 / MB)                                                    | Pass (12 pts) or Fail      | 12                     | LMP18-H8393 (0), LMP18-H2446 (0)         |
| H. Number of allele differences compared to reference (≤ 3)                                             | Pass (12 pts) or Fail      | 12                     | LMP18-H8393 (0), LMP18-H2446 (0)         |

**II. Submission of Results (20 pts)**

|                                                                 |          |   |  |
|-----------------------------------------------------------------|----------|---|--|
| A. PT isolates sequenced on a full (~80 MB) 500 cycle cartridge | 6 points | 6 |  |
| B. Fastq files named correctly                                  | 6 points | 6 |  |
| C. Results correctly submitted to BaseSpace or FTP              | 6 points | 6 |  |
| D. Submission email sent to PulseNet@cdc.gov                    | 2 points | 2 |  |

**III. Summary of Results**

|                                    |              |      |  |
|------------------------------------|--------------|------|--|
| Total points received              |              | 95   |  |
| Overall proficiency testing result | Pass or Fail | Pass |  |

WGS Performed by: [REDACTED]

Results Submitted by: [REDACTED]

Equipment used: Illumina MiSeq [REDACTED]

Chemistry used: Illumina MiSeq V2 (500 cycle) and Nextera XT Library Prep Kit

Comments: The median insert size was below 300 bp. Optimizing your library prep with a particular focus on tagmentation and size selection steps will help reach minimum insert size required for certification. Results were confirmed both by mapping back to the reference using SMALT and by generating insert size distribution graphs included below using CLCBio.

**LMP18-H2446 Insert Size Histogram:**

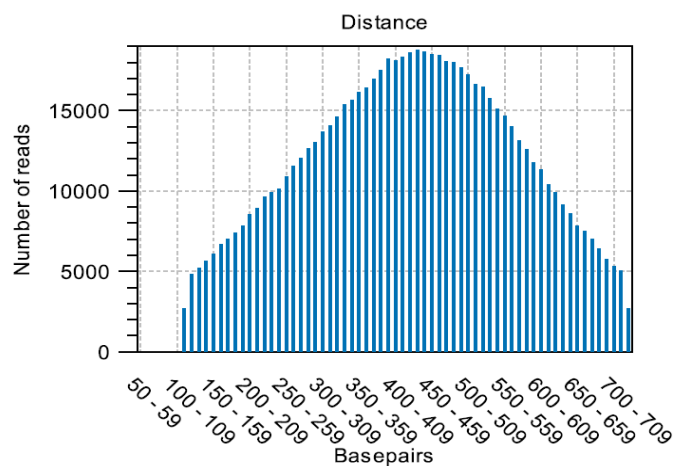

**LMP18-H8393 Insert Size Histogram:**

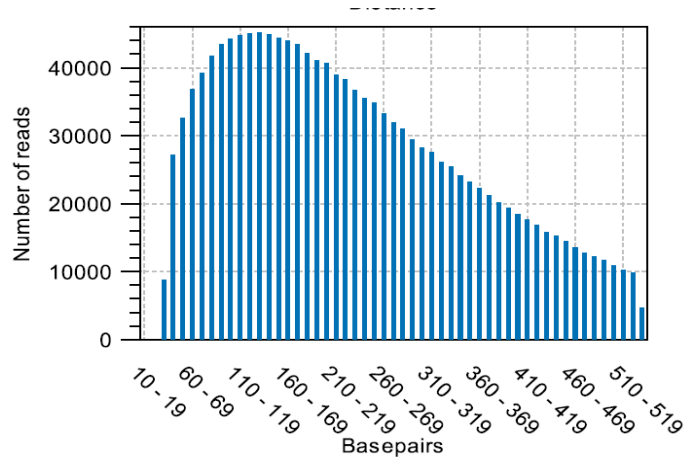

Items in Section I on the report form are in Pass / Fail format. If you fail any one of these sections, you fail the proficiency testing round. Laboratories that pass will accumulate the specified points. For quality metrics, all files were compared to the PulseNet WGS Quality Metrics (SOP appendix PNQ09-5). A passing score is  $\geq 85\%$  ( $\geq 85/100$ ). The methods used in the analysis of this sequence data are preliminary and remain under validation.

**Proficiency Testing Evaluation:**

**Fastq Evaluation Performed By:**

**Date:**

**Evaluation Performed By:**

**Date:**

**Approved By:**

**Date:**

**2nd PulseNet WGS Proficiency Testing Report Form (Winter 2018)**

**Organism** *Salmonella*

**Laboratory:** #81

Date strains shipped: 1/22/2018

Date results received: 3/19/2018

|                                                                                                         | Possible Points            | No. of Points Received | Comments                                                                                              |
|---------------------------------------------------------------------------------------------------------|----------------------------|------------------------|-------------------------------------------------------------------------------------------------------|
| <b>I. Sequencing and Fastq file Preparation (80 pts)</b>                                                |                            |                        |                                                                                                       |
| A. Q-score R1<br>(>30 = 4 pts; 28.00 - 29.99 plus 10-20x additional coverage = 1-3 pts; <28.00 = 0 pts) | Pass (1-4 pts) or Fail (0) | 4                      | SAP18-0432 (36.18), SAP18-6199 (36.08), SAP18-8729 (36.2), SAP18-H9654 (36.11)                        |
| B. Q-score R2<br>(>30 = 4 pts; 28.00 - 29.99 plus 10-20x additional coverage = 1-3 pts; <28.00 = 0 pts) | Pass (1-4 pts) or Fail (0) | 4                      | SAP18-0432 (32.71), SAP18-6199 (33.17), SAP18-8729 (33.9), SAP18-H9654 (33.61)                        |
| C. Average coverage (>30x)                                                                              | Pass (15 pts) or Fail      | 15                     | SAP18-0432 (133), SAP18-6199 (113.6), SAP18-8729 (164.1), SAP18-H9654 (170.4)                         |
| D. Median insert size (>300 = 15 pts; 275 - 299 = 12 pts; <274 = 4 pts)                                 | 15 points                  | 15                     | SAP18-0432 (339), SAP18-6199 (323), SAP18-8729 (302) SAP18-H9654 (327)                                |
| E. Assembled genome size (5 MB, 5% error margin)                                                        | Pass (14 pts) or Fail      | 14                     | SAP18-0432 (4.7), SAP18-6199 (4.9), SAP18-8729 (4.8), SAP18-H9654 (4.7)                               |
| F. Number of hqSNPs compared to reference (< 1 / MB)                                                    | Pass (14 pts) or Fail      | Fail                   | SAP18-0432 (0), SAP18-6199 (possible sample swap), SAP18-8729 (possible sample swap) SAP18-H9654 (0)  |
| G. Number of allele differences compared to reference ( $\leq 3$ )                                      | Pass (14 pts) or Fail      | Fail                   | SAP18-0432 (0), SAP18-6199 (possible sample swap), SAP18-8729 (possible sample swap), SAP18-H9654 (1) |

**II. Submission of Results (20 pts)**

|                                                                 |          |   |  |
|-----------------------------------------------------------------|----------|---|--|
| A. PT isolates sequenced on a full (~80 MB) 500 cycle cartridge | 6 points | 6 |  |
| B. Fastq files named correctly                                  | 6 points | 6 |  |
| C. Results correctly submitted to BaseSpace or FTP              | 6 points | 6 |  |
| D. Submission email sent to PulseNet@cdc.gov                    | 2 points | 2 |  |

**III. Summary of Results**

|                                    |              |      |  |
|------------------------------------|--------------|------|--|
| Total points received              |              |      |  |
| Overall proficiency testing result | Pass or Fail | Fail |  |

WGS Performed by:

Results Submitted by

Equipment used: Illumina MiSeq

Chemistry used: Illumina MiSeq V2 (500 cycle) and Nextera XT Library Prep Kit

**Comments:** It appears there may have been a sample swap with SAP18-6199 and SAP18-8729 based on results for initial hqSNP and wgMLST analysis (number of differences were abnormally high >200 wgMLST and >20,000SNPS). When samples were compared again by swapping these Reference genomes, the hqSNP and wgMLST results were within acceptable limits. SAP18-8729 had 1 hqSNP and 0 allele differences compared to the 6199 Reference Genome. SAP18-6199 had 2 SNP differences and 1 allele difference compared to the 8729 Reference genome.

**SAP18-0432 Insert Size Histogram:**

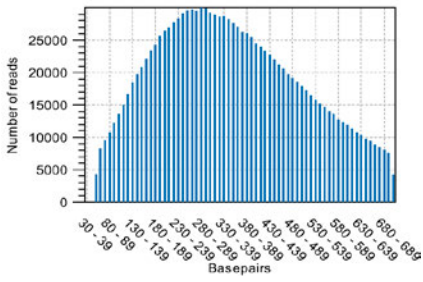

**SAP18-6199 Insert Size Histogram:**

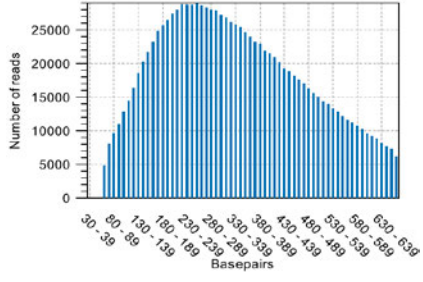

**SAP18-8729 Insert Size Histogram:**

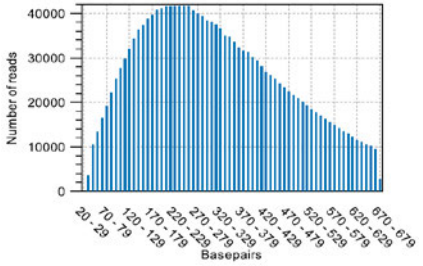

**SAP18-H9654 Insert Size Histogram:**

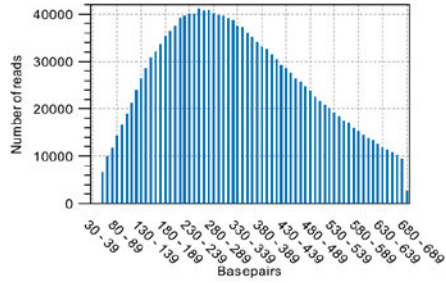

tems in Section I on the report form are in Pass / Fail format. If you fail any one of these sections, you fail the proficiency testing round. Laboratories that pass will accumulate the specified points. For quality metrics, all files were compared to the PulseNet WGS Quality Metrics (SOP appendix PNQ09-5). A passing score is  $\geq 85\%$  ( $\geq 85/100$ ). The methods used in the analysis of this sequence data are preliminary and remain under validation.

**Proficiency Testing Evaluation**

Fastq Evaluation Performed By

Date

Evaluation Performed By

Date

Approved By

Date

**Report 4.** Example 2018 GenomeTrakr proficiency test report prepared for anonymized laboratory #43 shown against the distribution of runs from all participating GenomeTrakr labs. Names of laboratory and people removed from report.

# A Statistical Analysis of 2018 Proficiency Testing Isolates

Joseph Baugher, Ph.D.

August 6, 2018

## Contents

|          |                             |           |
|----------|-----------------------------|-----------|
| <b>1</b> | <b>Overview</b>             | <b>2</b>  |
| <b>2</b> | <b>Results</b>              | <b>3</b>  |
| 2.1      | Run Metrics . . . . .       | 3         |
| 2.2      | Read Metrics . . . . .      | 4         |
| 2.3      | Alignment Metrics . . . . . | 5         |
| 2.4      | Assembly Metrics . . . . .  | 8         |
| <b>3</b> | <b>Conclusions</b>          | <b>9</b>  |
| <b>A</b> | <b>Appendix</b>             | <b>10</b> |

# 1 Overview

This report provides graphical visualization of analytical metrics for bacterial WGS data compared to a distribution of isolates sequenced during the 2018 PulseNet-GenomeTrakr harmonized Proficiency Testing exercise as part of a 16-sample 2X250 run on an Illumina MiSeq machine (V2 chemistry) using the Nextera XT DNA Library Prep Kit.

Sequencing runs were analyzed using the CFSAN SNP Pipeline v1.0. Reference sequences were generated by the PacBio SMRT sequencer, closed using the HGAP software, and polished with MiSeq data using pilon v1.22. Standard metrics are provided by the CFSAN SNP Pipeline. Sequencing run quality was assessed using FastQC v0.11.5. Assembly quality was assessed using the SPAdes Genome Assembler v3.11.1 and QUAST v4.5.

|   | Isolate ID  | CFSAN ID    | Organism                                                                 |
|---|-------------|-------------|--------------------------------------------------------------------------|
| 1 | SAP18-0432  | CFSAN074386 | Salmonella enterica subsp. enterica serovar Enteritidis str. SAP18-0432  |
| 2 | SAP18-H9654 | CFSAN074385 | Salmonella enterica subsp. enterica serovar Enteritidis str. SAP18-H9654 |
| 3 | SAP18-6199  | CFSAN074387 | Salmonella enterica subsp. enterica serovar Typhimurium str. SAP18-6199  |
| 4 | SAP18-8729  | CFSAN074384 | Salmonella enterica subsp. enterica serovar Newport str. SAP18-8729      |
| 5 | LMP18-H2446 | CFSAN074383 | Listeria monocytogenes str. LMP18-H2446                                  |
| 6 | LMP18-H8393 | CFSAN074382 | Listeria monocytogenes str. LMP18-H8393                                  |

**Table 1:** The 2018 PulseNet-GT harmonized PT strains.

|   | Isolate ID | Sample Name  | Machine | Flowcell | QC Status |
|---|------------|--------------|---------|----------|-----------|
| 1 | H2446      | LMP18-H2446- |         | BDTYL    | Passed    |
| 2 | H8393      | LMP18-H8393- |         | BDTYL    | Passed    |
| 3 | 0432       | SAP18-0432-  |         | BDTYL    | Passed    |
| 4 | 6199       | SAP18-6199-  |         | BDTYL    | Passed    |
| 5 | 8729       | SAP18-8729-  |         | BDTYL    | Passed    |
| 6 | H9654      | SAP18-H9654- |         | BDTYL    | Passed    |

**Table 2:** PT isolates submitted for analysis.



## 2 Results

The following section contains graphical representations of your PT sequencing run (red data points) and the distribution of runs from all participating GenomeTrakr labs (boxplots with background data points and black outliers). The isolates are labeled (x-axis) using the Isolate ID (see Table 1). For each box plot, the box defines the median value as well as the lower and upper quartiles (25% and 75%). The whiskers extend to the most extreme data point which is no more than 2.5 times the interquartile range from the median. Note - extreme outliers may have been removed from individual reports in order to improve utility.

### 2.1 Run Metrics

The following run metrics were evaluated (**Fig. 1**) -

- Cluster Density (K/mm<sup>2</sup>)** - density of clusters for each tile.
- Clusters PF (%)** - the percentage of clusters passing filter for each tile.
- Reads PF (M)** - the number of reads/clusters passing filter (millions).
- Yield (Gb)** - the total yield in Gigabases.
- Bases  $\geq$  Q30 (%)** - the percentage of bases with a quality score  $\geq$  30.
- Reads Identified (%)** - the percentage of Reads PF which were assigned to an index.
- Indexing CV** - the coefficient of variation for the number of counts across all indices.

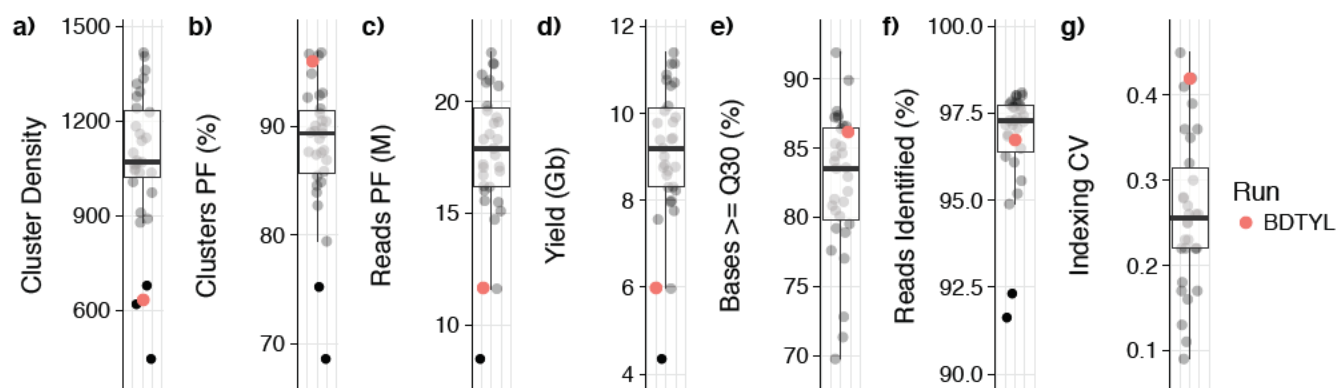

Figure 1: Run Metrics

|                                      | BDTYL | Expected |
|--------------------------------------|-------|----------|
| Cluster Density (K/mm <sup>2</sup> ) | 633   | 800-1100 |
| Clusters PF (%)                      | 96.07 |          |
| Reads PF (M)                         | 11.66 | 12-15    |
| Yield (Gb)                           | 5.99  | 7.5-8.5  |
| Bases $\geq$ Q30 (%)                 | 86.21 | >75%     |
| Reads Identified (%)                 | 96.75 |          |
| Indexing CV                          | 0.42  |          |

Table 3: Run metrics and manufacturer expected values for MiSeq V2 2x250 runs.

## 2.2 Read Metrics

The following read metrics were evaluated (Figs. 2-4) -

2. Reads - the number of read pairs.
3. Mean read quality scores - forward reads (R1) - QC threshold = Q27.
4. Mean read quality scores - reverse reads (R2) - QC threshold = Q27.

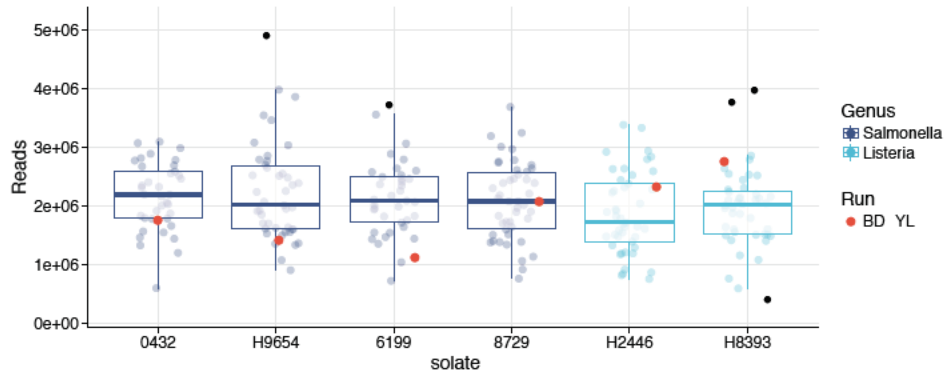

Figure 2: Reads

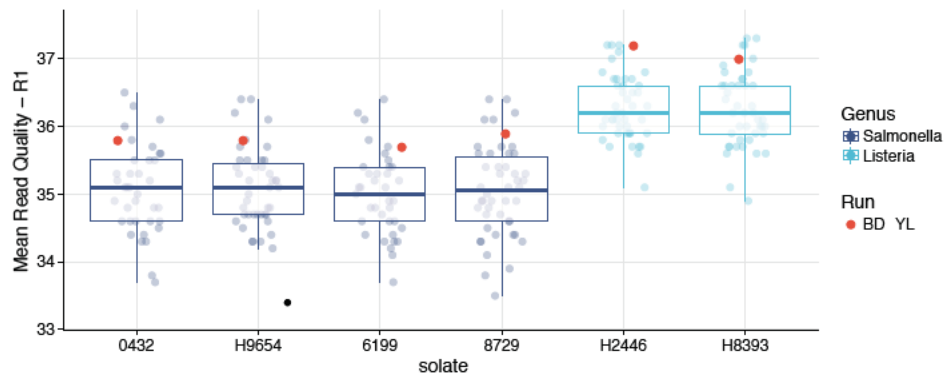

Figure 3: Mean read quality score - forward reads (R1)

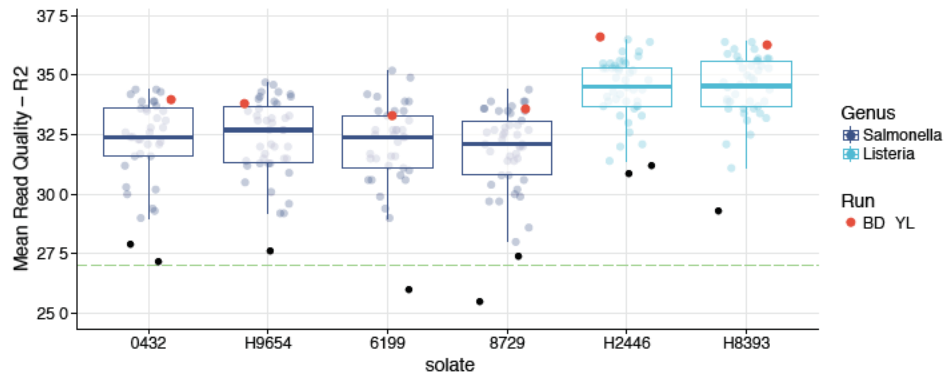

Figure 4: Mean read quality score - reverse reads (R2)

## 2.3 Alignment Metrics

The following alignment metrics were evaluated (Figs. 5-11) -

5. **Mean depth** - the mean depth of coverage after mapping reads to the reference. QC threshold = 20X.

6. **Reads mapped (%)** - the percentage of reads which could be mapped to the reference.

7. **Genome fraction** - the percentage of the reference with  $\geq 1X$  coverage.

8. **Low coverage positions** - the number of positions with depth of coverage  $< 10X$ . This metric is highly inversely correlated with assembly quality.

9. **SNPs** - the number of SNPs reported.

10. **Mean insert size** - the mean length of the sequence between the adapters.

11. **Coverage Plots** - visualizations of coverage depth and variance across each position.

Coverage plots were smoothed to 10000 points. Histograms of the coverage depth should resemble a Poisson-like distribution with a small standard deviation.

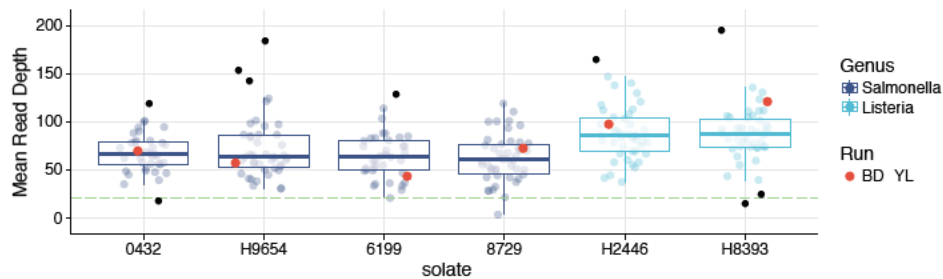

Figure 5: Mean depth

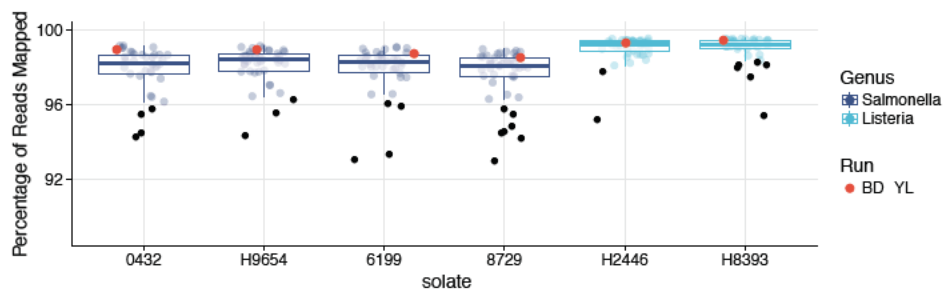

Figure 6: Reads mapped (%)

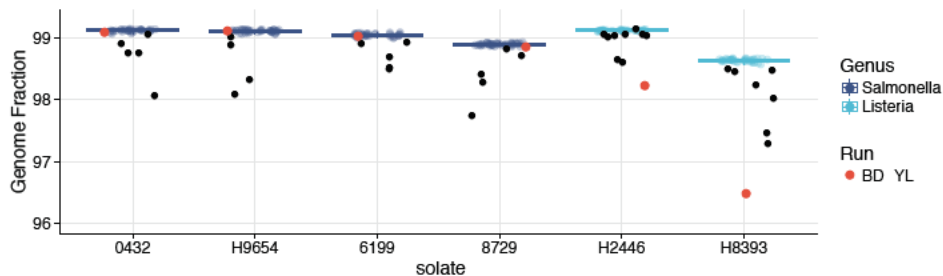

Figure 7: Genome fraction (%)

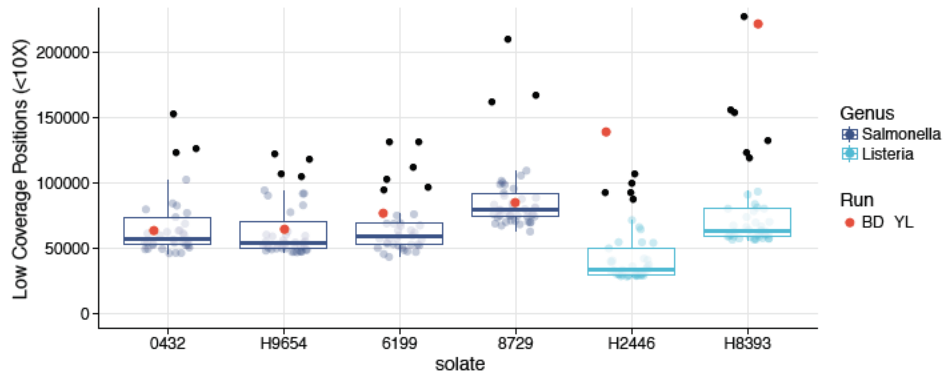

Figure 8: Low coverage positions (< 10X)

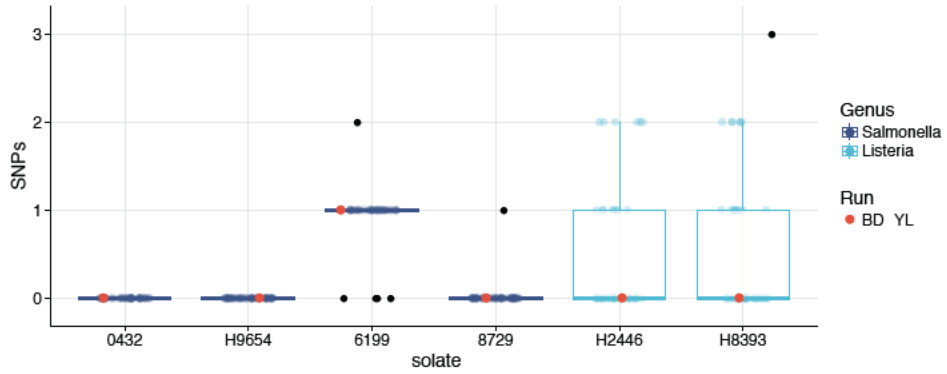

Figure 9: SNPs

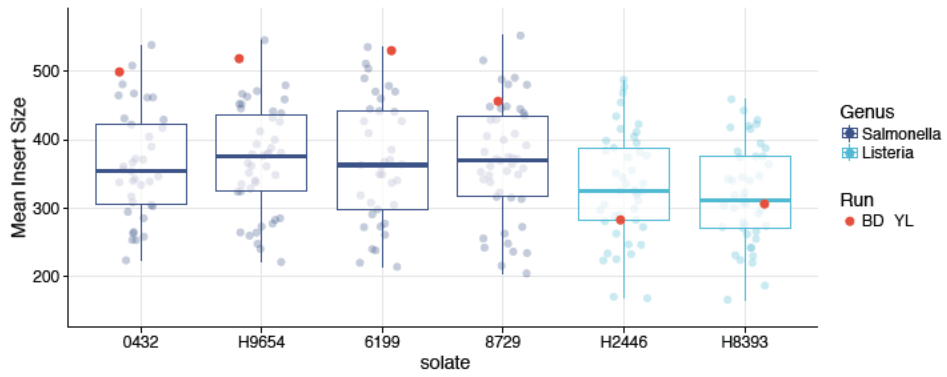

Figure 10: Mean insert size

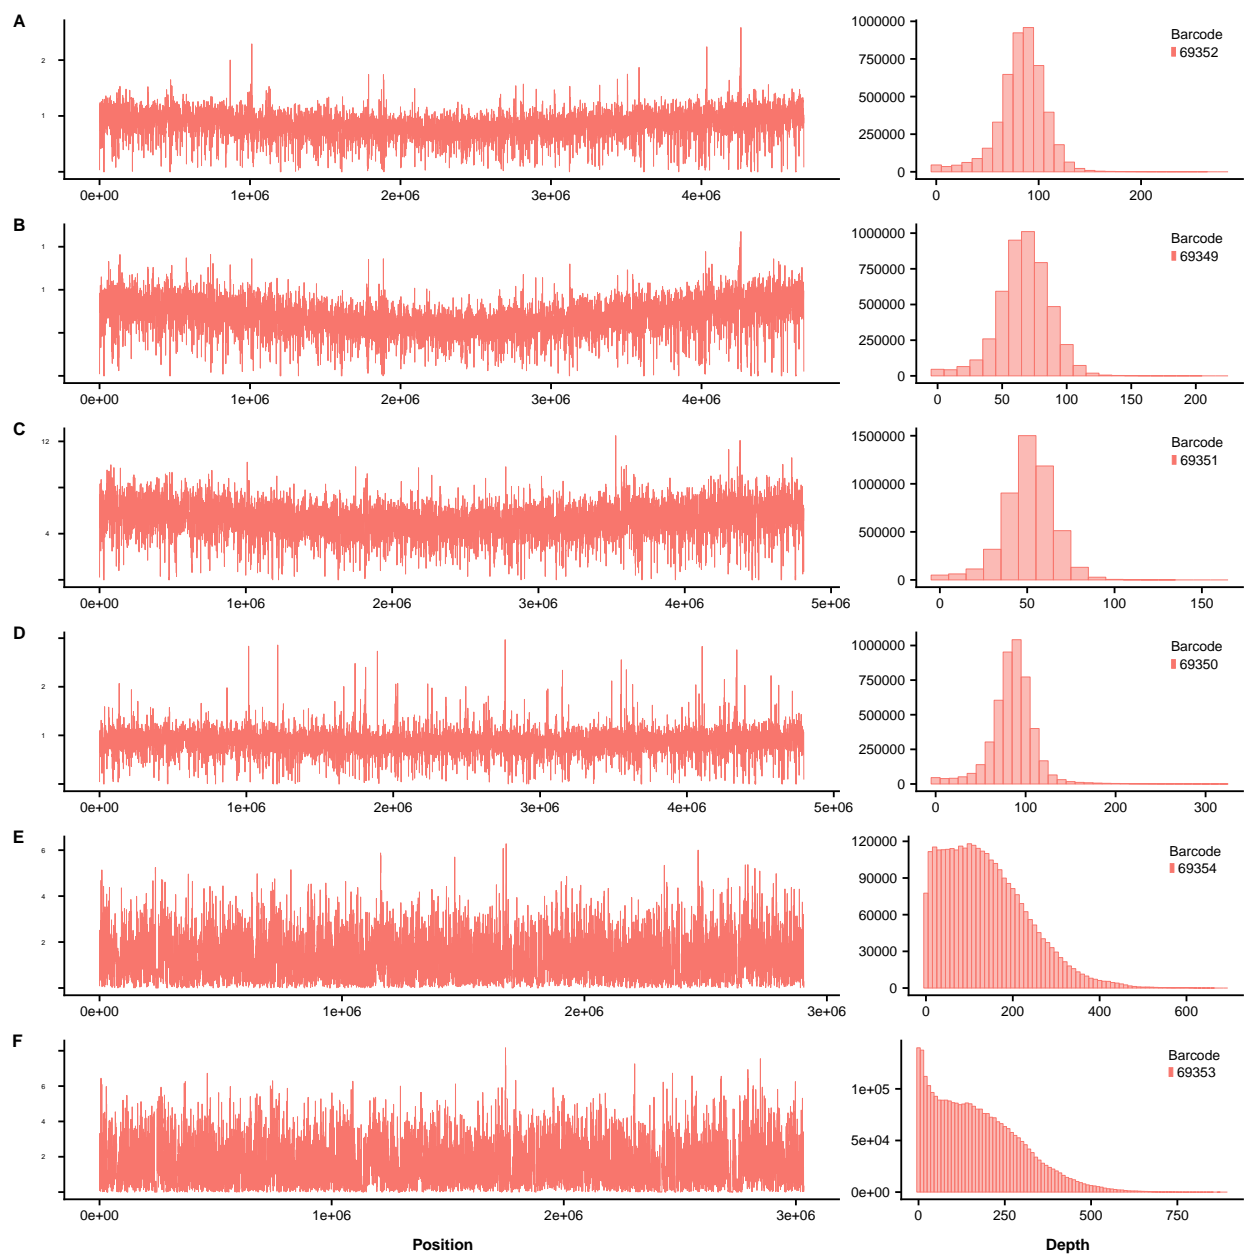

**Figure 11:** Coverage Plots. A. SAP18-0432 B. SAP18-H9654 C. SAP18-6199 D. SAP18-8729 E. LMP18-H2446 F. LMP18-H8393. Due to the possibility of replicates, the individual coverage datasets are labeled using unique Barcode IDs (see Appendix).

## 2.4 Assembly Metrics

The following assembly metrics were evaluated (Figs. 12-15) -

**12. NG50** - The NG50 assembly quality metric. The contig length such that using equal or longer length contigs produces x% of the length of the reference genome, allowing for comparisons between different genomes. Larger NG50 values generally correlate with a higher quality assembly.

**13. Contigs** - The total number of contigs in the assembly. Fewer contigs generally correlate with a higher quality assembly.

**14. Total Length Delta** - the difference between the lengths of the assembly and the reference. A perfect assembly would produce a delta of zero. Positive values indicate possible contamination.

**15. Unaligned Length** - the total length of any assembled contigs which could not be aligned to the reference genome. The presence of unalignable contigs could indicate an unexpected genomic element (plasmid, phage) or contamination.

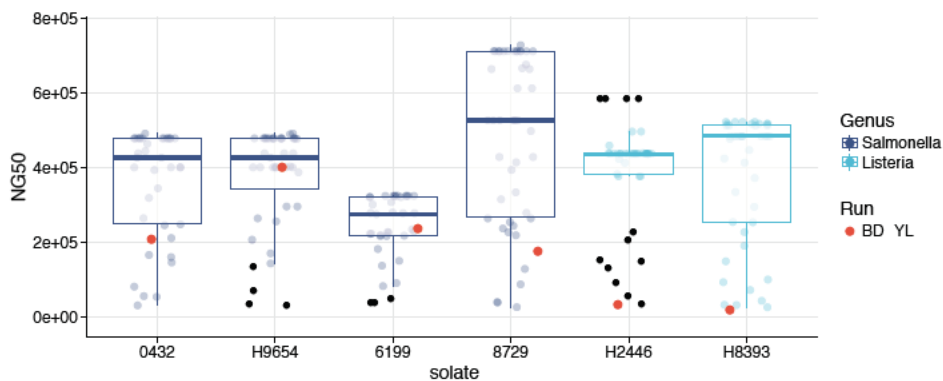

Figure 12: NG50

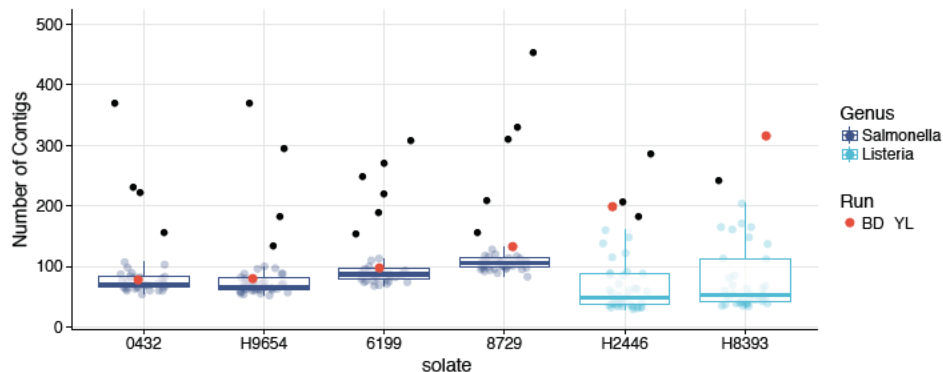

Figure 13: Contigs

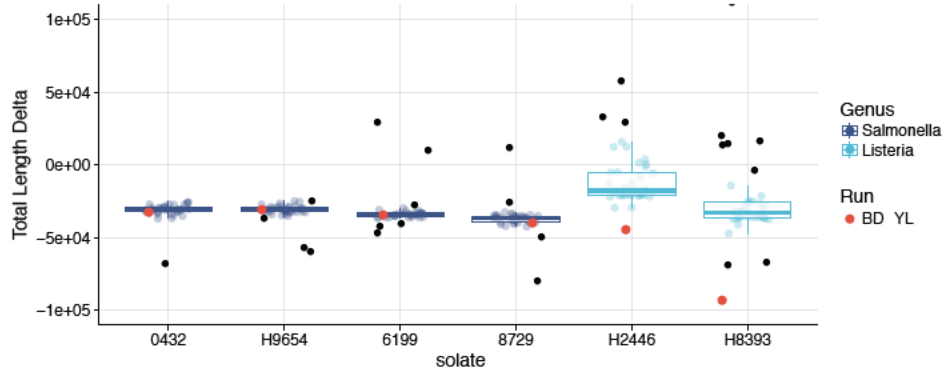

Figure 14: Total Length Delta

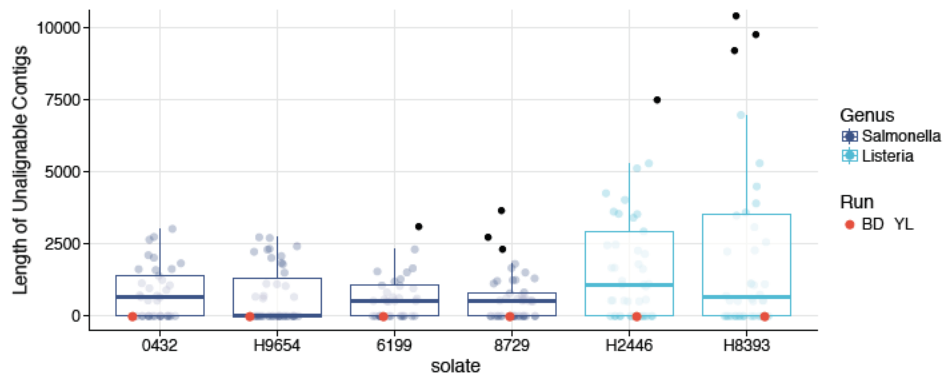

Figure 15: Unaligned Length

### 3 Conclusions

The assembly quality is worse than expected for 4 of the 6 isolates (Figs. 12 and 13). The *Listeria* isolates show extreme variance in coverage depth (Figs. 8 and 11), resulting in very poor assembly quality.

Of the 6 PT isolates submitted as part of this exercise, 6 (100%) were determined to be correctly annotated and to have met the minimum thresholds for read depth (20X) and mean read quality (Q27).

Figures 1-15 illustrate the performance of your PT sequencing run(s) based on an evaluation of metrics within the context of the entire distribution of all participants in the 2018 PulseNet-GT harmonized PT exercise. Pay particular attention to any figures in which values for your run fall outside of the 25% - 75% interquartile range (the boundaries of the box in the plot).

# A Appendix

|   | SampleName   | Barcode      | IsolateID   | CFSANID     | Lab | Sequencer               | Machine | FlowCell        | SequencedBy | SeqLength | Reads   |
|---|--------------|--------------|-------------|-------------|-----|-------------------------|---------|-----------------|-------------|-----------|---------|
| 1 | LMP18-H2446- | SEQ000069354 | LMP18-H2446 | CFSAN074383 |     | Illumina MiSeq sequence |         | 000000000-BDTYL |             | 35-251    | 2324708 |
| 2 | LMP18-H8393- | SEQ000069353 | LMP18-H8393 | CFSAN074382 |     | Illumina MiSeq sequence |         | 000000000-BDTYL |             | 35-251    | 2773800 |
| 3 | SAP18-0432-  | SEQ000069352 | SAP18-0432  | CFSAN074386 |     | Illumina MiSeq sequence |         | 000000000-BDTYL |             | 35-251    | 1773420 |
| 4 | SAP18-6199-  | SEQ000069351 | SAP18-6199  | CFSAN074387 |     | Illumina MiSeq sequence |         | 000000000-BDTYL |             | 35-251    | 1133060 |
| 5 | SAP18-8729-  | SEQ000069350 | SAP18-8729  | CFSAN074384 |     | Illumina MiSeq sequence |         | 000000000-BDTYL |             | 35-251    | 2087700 |
| 6 | SAP18-H9654- | SEQ000069349 | SAP18-H9654 | CFSAN074385 |     | Illumina MiSeq sequence |         | 000000000-BDTYL |             | 35-251    | 1423320 |

**Table 4:** Run Metadata.

|   | SampleName   | MeanR1 | MeanR2 | PercMapped | MeanDepth | SNPs | MeanInsert | GenomeFraction | CovLT10   | NG50   | Contigs | LengthDelta | UnalignedLength |
|---|--------------|--------|--------|------------|-----------|------|------------|----------------|-----------|--------|---------|-------------|-----------------|
| 1 | LMP18-H2446- | 37.20  | 36.60  | 99.33      | 97.09     | 0    | 282.80     | 98.24          | 138913.00 | 33574  | 198     | -43927      | 0               |
| 2 | LMP18-H8393- | 37.00  | 36.30  | 99.48      | 120.69    | 0    | 305.26     | 96.49          | 221835.00 | 19439  | 315     | -93313      | 0               |
| 3 | SAP18-0432-  | 35.80  | 34.00  | 99.02      | 70.17     | 0    | 499.59     | 99.09          | 64229.00  | 206776 | 78      | -32223      | 0               |
| 4 | SAP18-6199-  | 35.70  | 33.30  | 98.81      | 43.04     | 1    | 530.50     | 99.04          | 76603.00  | 238715 | 97      | -34252      | 0               |
| 5 | SAP18-8729-  | 35.90  | 33.60  | 98.59      | 71.66     | 0    | 456.42     | 98.85          | 85443.00  | 177181 | 132     | -39517      | 0               |
| 6 | SAP18-H9654- | 35.80  | 33.80  | 98.99      | 56.75     | 0    | 518.08     | 99.12          | 65008.00  | 401093 | 80      | -30348      | 0               |

**Table 5:** Run Metadata Continued.
